# Supplementary material
Source: PubMed Central journal article supplement (PMC2662265)
Supplement: M802789200_1.pdf [file M802789200_1.pdf]

## SUPPLEMENTARY MATERIAL

<sup>1</sup>H assignments for pentapeptide 2 in D<sub>2</sub>O, pH 5.2

| <u>Residue</u> | <u>Atom</u>                   | <u>Chemical Shift<br/>(p.p.m.)</u> |
|----------------|-------------------------------|------------------------------------|
| DPro-1         | C <sup>α</sup> H              | 4.32                               |
|                | C <sup>β</sup> H <sub>2</sub> | 2.17, 1.96                         |
|                | C <sup>γ</sup> H <sub>2</sub> | 2.15, 1.97                         |
|                | C <sup>δ</sup> H <sub>2</sub> | 2.68, 3.55                         |
| Ala-2          | NH                            | 8.90                               |
|                | C <sup>α</sup> H              | 4.21                               |
|                | C <sup>β</sup> H <sub>3</sub> | 1.40                               |
| Lys-3          | NH                            | 7.79                               |
|                | C <sup>α</sup> H              | 4.50                               |
|                | C <sup>β</sup> H <sub>2</sub> | 1.96, 1.80                         |
|                | C <sup>γ</sup> H <sub>2</sub> | 1.40, 1.31                         |
|                | C <sup>δ</sup> H <sub>2</sub> | 1.67                               |
|                | N <sup>ε</sup> H <sub>3</sub> | 2.94                               |
| Lys-4          | NH                            | 7.93                               |
|                | C <sup>α</sup> H              | 3.98                               |
|                | C <sup>β</sup> H <sub>2</sub> | 1.85                               |
|                | C <sup>γ</sup> H <sub>2</sub> | 1.45, 1.40                         |
|                | C <sup>δ</sup> H <sub>2</sub> | 1.66                               |
|                | N <sup>ε</sup> H <sub>3</sub> | 2.94                               |
| Arg-5          | NH                            | 7.73                               |
|                | C <sup>α</sup> H              | 4.54                               |
|                | C <sup>β</sup> H <sub>2</sub> | 1.77, 1.51                         |
|                | C <sup>γ</sup> H <sub>2</sub> | 1.62                               |
|                | C <sup>δ</sup> H <sub>2</sub> | 3.19                               |
|                | N <sup>ε</sup> H              | 7.20                               |

Dihedral Angles (in degrees) for the backbone of the NMR structure of pentapeptide 2

| <u>Residue</u> | <u>Angle</u> | <u>Average value</u><br><u>± SD</u> |
|----------------|--------------|-------------------------------------|
| DPro-1         | φ            | 83.36 ± 3.3                         |
|                | ψ            | -109.2 ± 2.4                        |
|                | ω            | -170.7 ± 1.1                        |
| Ala-2          | φ            | -41.4 ± 3.8                         |
|                | ψ            | -68.0 ± 1.8                         |
|                | ω            | 180.0 ± 0.0                         |
| Lys-3          | φ            | -119.7 ± 0.3                        |
|                | ψ            | -102.9 ± 4.0                        |
|                | ω            | 180.0 ± 0.0                         |
| Lys-4          | φ            | -42.0 ± 2.2                         |
|                | ψ            | -58.3 ± 2.3                         |
|                | ω            | 180 ± 0.0                           |
| Arg-5          | φ            | 83.36 ± 3.3                         |
|                | ψ            | -109.2 ± 2.4                        |
|                | ω            | -170.7 ± 1.1                        |
